# Supplementary material
Source: PubMed Central journal article supplement (PMC5067750)
Supplement: IAI.00568-16_zii999091865so1.pdf [file IAI.00568-16_zii999091865so1.pdf]

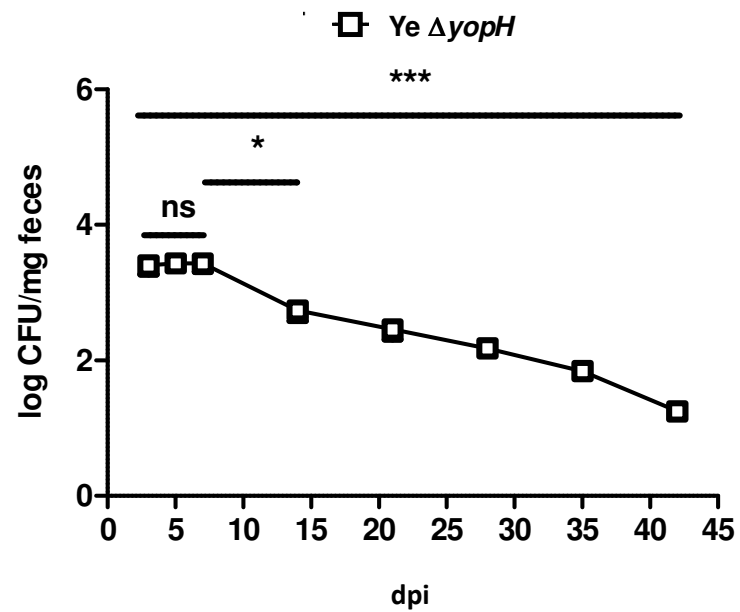

**Figure S1. Kinetics of bacterial clearance in feces of mice infected with *Y. enterocolitica* (Ye)  $\Delta yopH$ .** At the indicated days post infection (dpi), the data are shown as mean and SEM from the summary results of 2 experiments. n=3-5 mice per day for each group of mice. (\* P<0.05, \*\*\*P<0.001).

**A**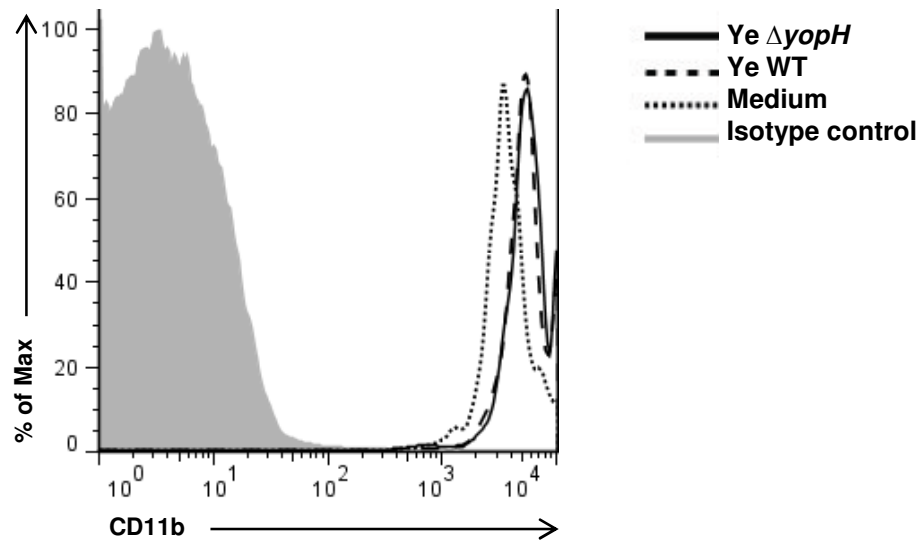**B**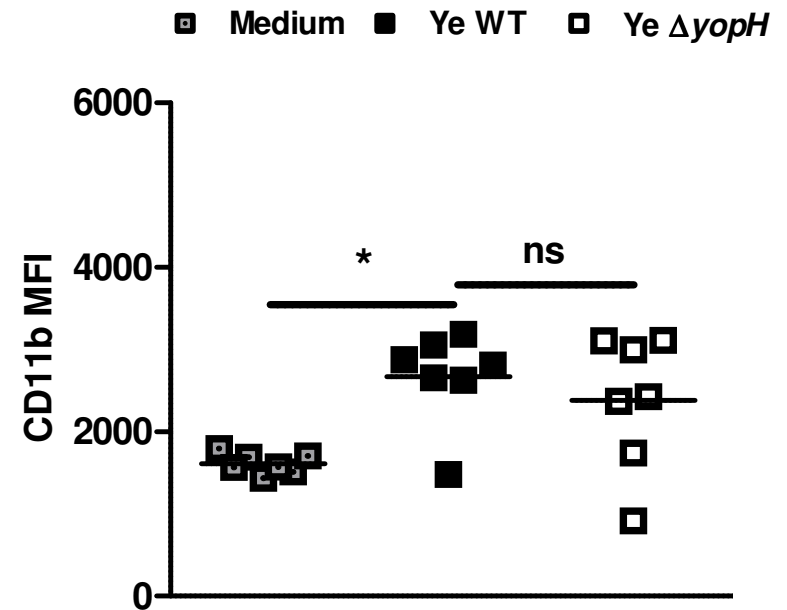

**Figure S2. Expression of CD11b after *in vitro* infection.** Blood neutrophils were *in vitro* infected with *Y. enterocolitica* (Ye) WT or Ye  $\Delta yopH$  at multiplicity of infection (moi) 50:1 for 30 min. The cells were washed and the CD11b expression in Ly6G<sup>+</sup> cells was analyzed by flow cytometry. A) Representative overlaid flow cytometry histogram analysis showing CD11b expression on neutrophils (Ly6G<sup>+</sup> SSC<sup>hi</sup>) gate compared with uninfected cells (medium). Isotype control (grey peak). B) The average CD11b mean fluorescence intensity (MFI) levels are indicated in the graphics. The data are the summary results of 2 experiments. Each symbol represents cells from an individual mouse; horizontal lines indicate the mean. (\* $P < 0.05$ ), ns: not significant.

## Blood

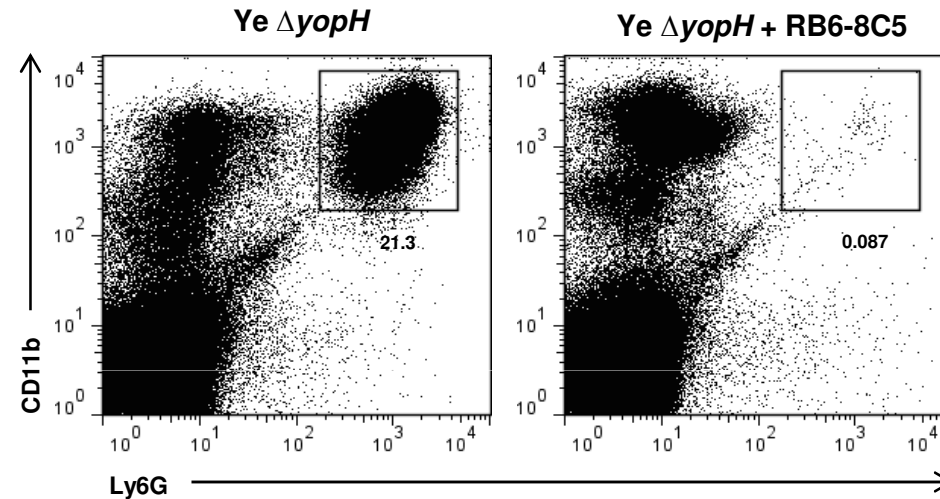

**Figure S3. Effect of RB6-8C5 monoclonal antibody administration on blood neutrophils in *Y. enterocolitica*  $\Delta yopH$ -infected C57BL/6 mice.** Mice were injected intraperitoneally with 100  $\mu$ g of the monoclonal anti-Gr1 antibody (clone RB6-8C5) 1 day before, and on days 2 and 3 after intragastric *Y. enterocolitica* (*Ye*)  $\Delta yopH$  infection. Control mice received same dosage of saline. Representative dot plot showing analysis of neutrophils in blood from control (*Ye*  $\Delta yopH$ ) and neutrophil-depleted (*Ye*  $\Delta yopH$  + RB6-8C5) at day 3 after infection. The numbers in the plots indicate the percentages of labeled cells in representative mice. The RB6-8C5 treatment resulted in more than 95% depletion of neutrophils from blood.
